# Supplementary material for: Identification of Survival-Specific Genes in Clear Cell Renal Cell Carcinoma Using a Customized Next-Generation Sequencing Gene Panel
Source: MDPI journal article supplement (doi:10.3390/jpm12010113), 2022-01-14
Supplement: s1 [file s1]

## Supplementary Materials

**Table S1. (a).** The performance of feature selection method\_Information Gain (IG) depending on the weights and classifiers.

| Information Gain<br>Weight (Gene Number) | Classification Algorithms, Accuracy (%) |              |              |
|------------------------------------------|-----------------------------------------|--------------|--------------|
|                                          | Naïve Bayes                             | K-NN (K = 3) | SVM          |
| ≥0.015 (17)                              | 79.54                                   | <b>72.32</b> | 78.34        |
| ≥0.011 (78)                              | 92.31                                   | 68.98        | 80.98        |
| ≥0.008 (95)                              | 92.55                                   | 68.48        | 81.21        |
| ≥0.005 (537)                             | <b>99.04</b>                            | 66.31        | <b>83.86</b> |

The highest values are bolded. K-NN, K-Nearest Neighbor; K, number of nearest neighbors; SVM, Support Vector Machine.

**Table S1. (b).** The performance of feature selection method\_Chi-squared depending on the sample sizes and classifiers.

| Chi-squared<br>Sample size (Gene Number) | Classification Algorithms, Accuracy (%) |              |              |
|------------------------------------------|-----------------------------------------|--------------|--------------|
|                                          | Naïve Bayes                             | K-NN (K = 3) | SVM          |
| ≥7 (20)                                  | 79.54                                   | <b>72.56</b> | 77.63        |
| ≥5 (85)                                  | 91.59                                   | 68.48        | 80.73        |
| ≥3 (461)                                 | 86.6                                    | 66.07        | 81.21        |
| ≥2 (621)                                 | <b>97.37</b>                            | 66.07        | <b>83.61</b> |

The highest values are bolded. K-NN, K-Nearest Neighbor; K, number of nearest neighbors; SVM, Support Vector Machine.

**Table S1. (c).** The performance of feature selection method\_MRMR depending on the numbers of relevant genes and classifiers.

| MRMR<br>Number of Relevant Genes | Classification Algorithms, Accuracy (%) |              |              |
|----------------------------------|-----------------------------------------|--------------|--------------|
|                                  | Naïve Bayes                             | K-NN (K = 3) | SVM          |
| Top 10                           | 42.55                                   | 68.25        | 68.76        |
| Top 20                           | 76.67                                   | <b>72.58</b> | 72.84        |
| Top 30                           | 80.75                                   | 72.56        | 77.86        |
| Top 100                          | <b>93.49</b>                            | 67.27        | <b>83.39</b> |

The highest values are bolded. MRMR, Minimum Redundancy-Maximum Relevance; K-NN, K-Nearest Neighbor; K, number of nearest neighbors; SVM, Support Vector Machine.

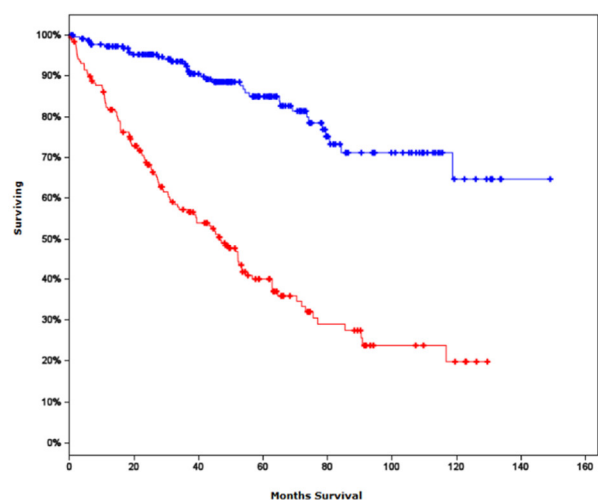

#### ▷ Information Gain (Survival-related Top 100 genes)

-  $p$  - value: <0.001

|                   | Total | Decease | Median Survival (Months) | Decease (%) |
|-------------------|-------|---------|--------------------------|-------------|
| Mutation Positive | 190   | 112     | 46.55                    | 58.9        |
| Mutation Negative | 227   | 35      | NA                       | 15.4        |
|                   | 37    | 77      |                          | 43.5        |

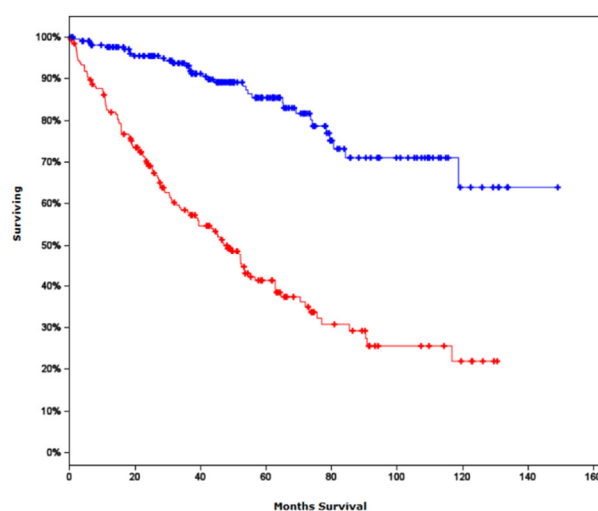

#### ▷ Chi-square (Survival-related Top 100 genes)

-  $p$  - value: <0.001

|                   | Total | Decease | Median Survival (Months) | Decease (%) |
|-------------------|-------|---------|--------------------------|-------------|
| Mutation Positive | 198   | 114     | 47.04                    | 57.6        |
| Mutation Negative | 219   | 33      | NA                       | 15.1        |
|                   | 21    | 88      |                          | 42.5        |

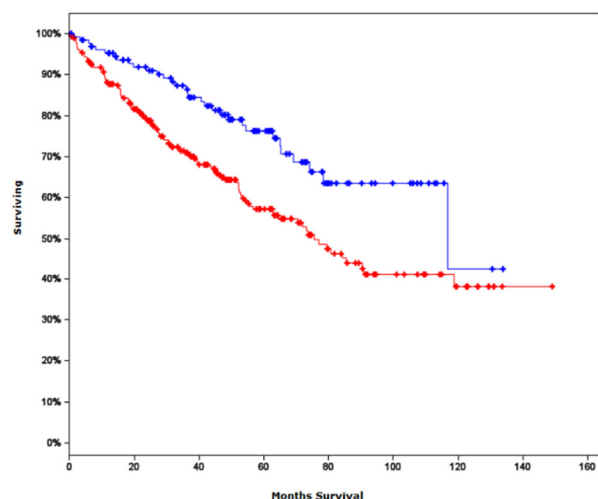

#### ▷ MRMR (Survival-related Top 100 genes)

-  $p$  - value: <0.00112

|                   | Total | Decease | Median Survival (Months) | Decease (%) |
|-------------------|-------|---------|--------------------------|-------------|
| Mutation Positive | 286   | 115     | 75.53                    | 40.2        |
| Mutation Negative | 131   | 32      | 116.75                   | 24.4        |
|                   | 155   | 83      | 41.22                    | 15.8        |

**Figure S1.** Survival curves of top 100 genes by three feature selection methods (Information Gain, Chi-squared test, and MRMR). NA, not available; MRMR, Minimum Redundancy-Maximum Relevance.

**Table S2.** A total of 123 survival-specific mutations selected in TCGA-KIRC using three feature selection methods (Information Gain, Chi-squared test, and MRMR).

| Feature Variable<br>(Clinicopathologic Factors) | Clinicopathologic Factor-Related Mutant Gene Number | Survival-Specific Mutant Gene Number |
|-------------------------------------------------|-----------------------------------------------------|--------------------------------------|
| Age                                             | 109                                                 | 15                                   |
| Gender                                          | 68                                                  | 9                                    |
| Stage                                           | 76                                                  | 32                                   |
| Recurrence                                      | 40                                                  | 38                                   |
| Metastasis                                      | 58                                                  | 30                                   |
| Survival                                        | 42                                                  | 34                                   |
| Total (deduplicated)                            | 195                                                 | 123                                  |

**Table S3.** A total of 21 of top-ranked mutant genes above 5% in TCGA-KIRC.

| Gene          | Mutation Frequency (%) | Mutation Number | Sample Number |
|---------------|------------------------|-----------------|---------------|
| <i>VHL</i>    | 49.9                   | 241             | 225           |
| <i>PBRM1</i>  | 30.6                   | 141             | 138           |
| <i>MUC4</i>   | 17.1                   | 129             | 77            |
| <i>TTN</i>    | 15.5                   | 84              | 70            |
| <i>MUC16</i>  | 12.9                   | 83              | 58            |
| <i>SETD2</i>  | 11.3                   | 58              | 51            |
| <i>BAP1</i>   | 8.9                    | 42              | 40            |
| <i>MTOR</i>   | 7.1                    | 33              | 32            |
| <i>FBN2</i>   | 6.7                    | 39              | 30            |
| <i>XIRP2</i>  | 6.2                    | 30              | 28            |
| <i>KDM5C</i>  | 6                      | 27              | 27            |
| <i>DNAH3</i>  | 6                      | 33              | 27            |
| <i>HMCN1</i>  | 5.8                    | 26              | 26            |
| <i>ARID1A</i> | 5.5                    | 28              | 25            |
| <i>TSHZ3</i>  | 5.5                    | 32              | 25            |
| <i>ARAP3</i>  | 5.5                    | 38              | 25            |
| <i>SSH2</i>   | 5.3                    | 28              | 24            |
| <i>VWF</i>    | 5.1                    | 35              | 23            |
| <i>AKAP9</i>  | 5.1                    | 29              | 23            |
| <i>SPEN</i>   | 5.1                    | 25              | 23            |
| <i>NAV3</i>   | 5.1                    | 26              | 23            |

**Table S4.** A total of 14 genes for other solid tumors.

| Gene                | Mutation Frequency (%) | Mutation Number | Sample Number |
|---------------------|------------------------|-----------------|---------------|
| <i>BRAF</i>         | 0.4                    | 3               | 2             |
| <i>BRCA1</i>        | 1.1                    | 6               | 5             |
| <i>BRCA2</i>        | 1.6                    | 7               | 7             |
| <i>EGFR</i>         | 2                      | 9               | 9             |
| <i>ALK</i>          | 0.9                    | 4               | 4             |
| <i>ERBB2 (HER2)</i> | 0.9                    | 4               | 4             |
| <i>IDH1</i>         | 0.4                    | 2               | 2             |
| <i>IDH2</i>         | 1.1                    | 5               | 5             |
| <i>MYCN</i>         | 0.2                    | 1               | 1             |
| <i>MYC</i>          | NA                     | NA              | NA            |
| <i>KIT</i>          | NA                     | NA              | NA            |
| <i>KRAS</i>         | 0.2                    | 1               | 1             |
| <i>PDGFRA</i>       | 1.1                    | 6               | 5             |
| <i>NRAS</i>         | NA                     | NA              | NA            |

NA, not available.

**Table S5.** The Pearson's correlation test revealed that the presence of a mutation in *CARD6* was inversely related to the period of OS (Patient P10: 14 months, the shortest).

| Characteristics         |                      | <i>CARD6</i> Mutation |    |          |                 |
|-------------------------|----------------------|-----------------------|----|----------|-----------------|
| Overall Survival, Month | Patient <i>n</i> (%) | Yes                   | No | <i>r</i> | <i>p</i> -Value |
|                         |                      |                       |    | −0.441   | 0.04            |
| 10–20                   | 3 (14%)              | 1                     | 2  |          |                 |
| 21–30                   | 1 (4%)               | 0                     | 1  |          |                 |
| 31–40                   | 12 (54%)             | 0                     | 12 |          |                 |
| 41–50                   | 6 (27%)              | 0                     | 6  |          |                 |

**Table S6.** The Pearson's correlation test showed that the presence of the *BAP1* mutation was moderately negatively related to the period of DFS (Patient P8: 28 months and alive, Patient P12: 0 month and alive, Patient P16: 1 month and dead, and Patient P22: 1 month and dead).

| Characteristics              |                      | <i>BAP1</i> Mutation |    |          |                 |
|------------------------------|----------------------|----------------------|----|----------|-----------------|
| Disease Free Survival, Month | Patient <i>n</i> (%) | Yes                  | No | <i>r</i> | <i>p</i> -Value |
|                              |                      |                      |    | −0.465   | 0.029           |
| 0–9                          | 5 (23%)              | 3                    | 2  |          |                 |
| 10–20                        | 4 (18%)              | 0                    | 4  |          |                 |
| 21–30                        | 3 (14%)              | 1                    | 2  |          |                 |
| 31–40                        | 8 (36%)              | 0                    | 8  |          |                 |
| 41–50                        | 2 (9%)               | 0                    | 2  |          |                 |

**Table S7.** The Pearson's correlation test revealed that the presence of a mutation in *SECISBP2L* was rigorously related to the spread of cancer cells to the lymph nodes and positively related to death (Patient P11: positive and dead).

| Characteristics       |                      | SECISBP2L Mutation |    |          |                 |
|-----------------------|----------------------|--------------------|----|----------|-----------------|
| N-stage (Lymph Nodes) | Patient <i>n</i> (%) | Yes                | No | <i>r</i> | <i>p</i> -Value |
| Positive (1)          | 1 (5%)               | 1                  | 0  | 0.463    | 0.03            |
| Negative (0)          | 21 (95%)             | 0                  | 21 |          |                 |
| Death                 |                      |                    |    |          |                 |
| Dead (1)              | 4 (18%)              | 1                  | 3  |          |                 |
| Alive (0)             | 18 (82%)             | 0                  | 18 |          |                 |

**Table S8.** The Pearson's correlation test revealed that the presence of a mutation in *SETD2* was moderately related to nuclear grade (Patient P3: grade 4, Patient P5: grade 3, Patient P8: grade 3, Patient P11: grade 4, Patient P12: grade 4, Patient P18: grade 2, Patient P20: grade 3, Patient P21: grade 3 and Patient P22: grade 4).

| Characteristics |                      | SETD2 Mutation |    |          |                 |
|-----------------|----------------------|----------------|----|----------|-----------------|
| Nuclear Grade   | Patient <i>n</i> (%) | Yes            | No | <i>r</i> | <i>p</i> -Value |
| 1               | 0                    | 0              | 0  | 0.451    | 0.035           |
| 2               | 6 (27%)              | 1              | 5  |          |                 |
| 3               | 11 (50%)             | 4              | 7  |          |                 |
| 4               | 5 (23%)              | 4              | 1  |          |                 |

**Table S9.** The Pearson's correlation test revealed that the presence of a mutation in *NLRP2* was strongly associated with sarcomatoid component (Patient P5: positive).

| Characteristics       |                      | NLRP2 Mutation |    |          |                 |
|-----------------------|----------------------|----------------|----|----------|-----------------|
| Sarcomatoid Component | Patient <i>n</i> (%) | Yes            | No | <i>r</i> | <i>p</i> -Value |
| Positive (1)          | 2 (10%)              | 1              | 1  | 0.69     | 0.0004          |
| Negative (0)          | 20 (90%)             | 0              | 20 |          |                 |

**Table S10.** Although mutation in *OBSCN* and sex were moderately associated, we noticed that both patients had *OBSCN* mutation were female (Patient P6 and Patient P12) in this case. It is also observed that Patient P12 had sarcomatoid component (Patient P12: positive).

| Characteristics       |                      | OBSCN Mutation |    |          |                 |
|-----------------------|----------------------|----------------|----|----------|-----------------|
| Sex                   | Patient <i>n</i> (%) | Yes            | No | <i>r</i> | <i>p</i> -Value |
| Male (0)              | 15 (68%)             | 0              | 15 | 0.462    | 0.03            |
| Female (1)            | 7 (32%)              | 2              | 5  |          |                 |
| Sarcomatoid Component |                      |                |    | 0.474    | 0.026           |
| Positive (1)          | 2 (10%)              | 1              | 1  |          |                 |
| Negative (0)          | 20 (90%)             | 1              | 19 |          |                 |

**Table S11.** The Pearson's correlation test revealed that the presence of a mutation in *USP40* was strongly associated with having sarcomatoid component (Patient P5: positive).

| Characteristics       |                      | USP40 Mutation |    |          |                 |
|-----------------------|----------------------|----------------|----|----------|-----------------|
| Sarcomatoid Component | Patient <i>n</i> (%) | Yes            | No | <i>r</i> | <i>p</i> -Value |
| Positive (1)          | 2 (10%)              | 1              | 1  | 0.69     | 0.00038         |
| Negative (0)          | 20 (90%)             | 0              | 20 |          |                 |

**Table S12.** The Pearson's correlation test revealed that the presence of a mutation in *AKAP9* was strongly associated with having sarcomatoid component (Patient P5: positive).

| Characteristics       |                      | AKAP9 Mutation |    | <i>r</i> | <i>p</i> -Value |
|-----------------------|----------------------|----------------|----|----------|-----------------|
|                       | Patient <i>n</i> (%) | Yes            | No |          |                 |
| Sarcomatoid Component |                      |                |    | 0.69     | 0.00038         |
| Positive (1)          | 2 (10%)              | 1              | 1  |          |                 |
| Negative (0)          | 20 (90%)             | 0              | 20 |          |                 |

**Table S13.** The Pearson's correlation test revealed that the presence of a mutation in *KDM5C* was strongly related to the fact that cancer tissue had spread to the nearby lymph nodes (P11: positive).

| Characteristics       |                      | KDM5C Mutation |    | <i>r</i> | <i>p</i> -Value |
|-----------------------|----------------------|----------------|----|----------|-----------------|
|                       | Patient <i>n</i> (%) | Yes            | No |          |                 |
| N-stage (Lymph Nodes) |                      |                |    | 0.69     | 0.00038         |
| Positive (1)          | 1 (5%)               | 1              | 0  |          |                 |
| Negative (0)          | 21 (95%)             | 1              | 20 |          |                 |

**Table S14.** The Pearson's correlation test revealed that *ADAMTS10* mutation was moderately associated with tumor size. Patient P18 had *ADAMTS10* mutation showed the largest tumor size (14.5cm) among 22 patients (size of tumors without mutation- mean: 6.2 cm, median: 5.5 cm).

| Characteristics |                      | ADAMTS10 Mutation |    | <i>r</i> | <i>p</i> -Value |
|-----------------|----------------------|-------------------|----|----------|-----------------|
|                 | Patient <i>n</i> (%) | Yes               | No |          |                 |
| Tumor Size, cm  |                      |                   |    | 0.585    | 0.004           |
| ≤7.0            | 14 (63%)             | 0                 | 16 |          |                 |
| >7.0            | 8 (37%)              | 1                 | 5  |          |                 |

**Table S15.** The Pearson's correlation test revealed that *ARID1A* mutation is moderately associated with tumor size. Patient P18 had *ARID1A* mutation showed the largest tumor size (14.5 cm) among 22 patients.

| Characteristics |                      | ARID1A Mutation |    | <i>r</i> | <i>p</i> -Value |
|-----------------|----------------------|-----------------|----|----------|-----------------|
|                 | Patient <i>n</i> (%) | Yes             | No |          |                 |
| Tumor Size, cm  |                      |                 |    | 0.585    | 0.004           |
| ≤7.0            | 14 (63%)             | 0               | 16 |          |                 |
| >7.0            | 8 (37%)              | 1               | 5  |          |                 |
